# Supplementary material for: Sensitivity analysis of rapid antigen tests for the Omicron SARS-CoV-2 variant detection from nasopharyngeal swab samples collected in Santiago of Chile
Source: PubMed Central journal article supplement (PMC9631301; doi:10.3389/fpubh.2022.976875), 2022-10-20
Supplement: Data_Sheet_1.pdf [file Data_Sheet_1.pdf]

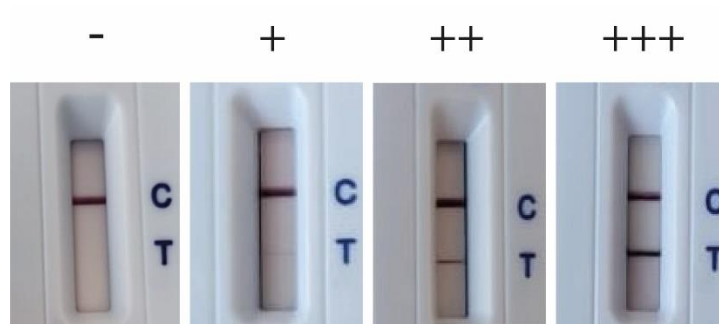

**Supplementary Figure 2. Representative images for the qualitative analysis of the band intensity obtained in the three RATs for the NPSs evaluated in the two C<sub>q</sub> ranges.** A symbol was assigned according to the band intensity. (-): negative (no band); (+): COVID-19 positive, low band intensity; (++) COVID-19 positive, moderate band intensity; (+++): COVID-19 positive, high intensity.
